# Supplementary material for: Preparation of DyVO4/WO3 heterojunction plate array films with enhanced photoelectrochemical activity
Source: Royal Society of Chemistry journal article supplement (doi:10.1039/c5ra22272a), 2016-01-01
Supplement: c5ra22272a1.pdf [file c5ra22272a1.pdf]

## Supporting Information

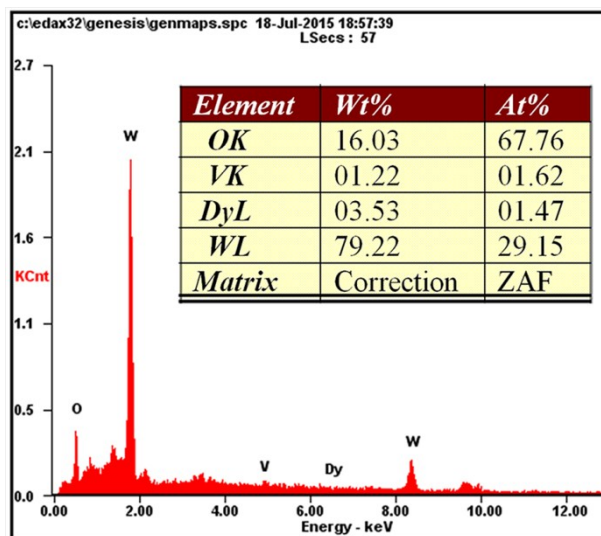

Fig. S1 The EDS spectra of DyVO<sub>4</sub>/WO<sub>3</sub> films

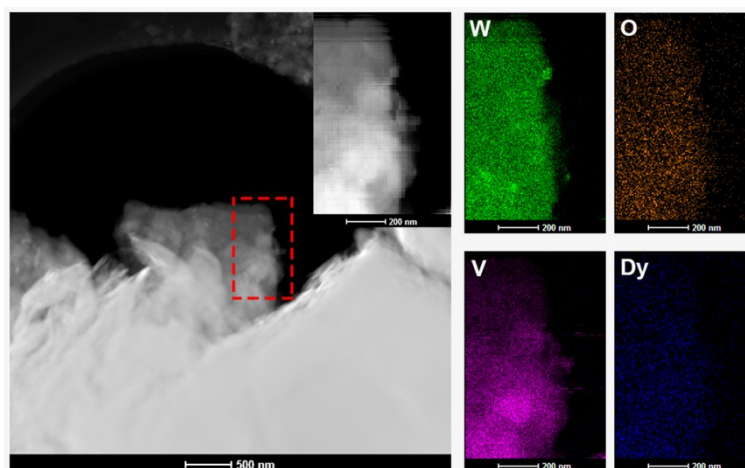

Fig. S2 The TEM-mapping images of DyVO<sub>4</sub>/WO<sub>3</sub> films
